# Supplementary material
Source: PubMed Central journal article supplement (PMC4054192)
Supplement: JB.01472-13_zjb999093191so1.pdf [file JB.01472-13_zjb999093191so1.pdf]

Supplemental materials of JB01472-13:

TABLE S1. Primers used in this study

| Primers | Sequences (5' to 3') <sup>a</sup>  |
|---------|------------------------------------|
| HA1F    | GCTGAATTCCTCGTCCATCATTTTTTGCGG     |
| HA1R    | TACAAGCTTCTCTAGACAGATGGTGCCTTTCC   |
| HA2F    | CGCGAATTCTCTAGACCGTCTACCTGACCAACTC |
| HA2R    | GCTAAGCTTGAGCTCCGTCACGTCCTGCGAAAT  |
| KF      | ATACCGTAAAGCACGAGG                 |
| KR      | CCCTGAATGAACTCCAAG                 |
| D1F     | TGCCAAAGGGTTCGTGTA                 |
| D1R     | CAGATGAGTTTCCCGGTT                 |
| D2F     | AGTTCGGGATCGAAAGC                  |
| D2R     | GGATGTAACGCACTGAG                  |
| S1F     | TCCGCCGCTGTTGCTGTT                 |
| S1R     | TCTGCCGCTGTGCCATT                  |
| S2R     | TGGGGTTCGCATGCTGAT                 |
| S3F     | GAATGTCATCCCGTTGC                  |
| SMF     | TGTCAGAGGCGGAGAATC                 |
| SMR     | CAAGTCAGAGGGTCCAATC                |
| ProbeF  | TGCGAATTCGTAACCAGCCAGCCATCT        |
| ProbeR  | GCTGAATTCCTTTCGTATGGCCCTGAC        |
| TF      | CGCGGGTACCTGGATTGGAGACTTGAT        |
| TR      | TATAGGATCCTGAACCCGCAGCCAGAACG      |
| TTF     | GCGCTGCAGTCCCGTTCTGGATAATGT        |
| 29F     | TGTGGTCTATGCGGAAAG                 |
| 29R     | GTTGGCGAAGTTGAAGGCT                |
| 44F     | CCACTGGATGGCCTACAAAT               |
| 44R     | CCGACAATCAGCATAAAGCCTG             |
| 48F     | TGTCCTTCGTGCTGATGC                 |

---

|       |                       |
|-------|-----------------------|
| 48R   | ATCCAGCGAAACCACCCT    |
| 267F  | ATACCTTCCGCAGCGAGTT   |
| 267R  | GGTAATGCAACAGATAACGCC |
| 269F  | GAAACCAGCACCTACACCT   |
| 269R  | TGGGTATCGAGCACGTATG   |
| 539F  | GCCCATTCATCGGTTTCAT   |
| 539R  | CGCCATTACTCAGACGCAT   |
| 1792F | TGCCATGATCGTCGCTTCC   |
| 1792R | TTCCTTGAGGCCCTTCGTC   |
| 2554F | GCGGGAGAAGGTCAAGAAGAT |
| 2554R | GTTGCTCATGTCGATGGTC   |
| 2558F | TCAAAGCCTTACGGGAAC    |
| 2558R | CGATTTATCCATCTGCTGCAC |

---

<sup>a</sup> Artificial restriction sites are underlined.

TABLE S2. Predicted sizes of the fragments amplified by PCR with the designed primer pairs in the screening for the  $\Delta tetH$  mutant

---

| Primer pairs | Templates and sizes of PCR products |                           |                          |
|--------------|-------------------------------------|---------------------------|--------------------------|
|              | Wild type (WT)                      | $\Delta tetH$ Mutant (MT) | Single recombinant (B1)  |
| S1 (S1F/S1R) | 1723 bp                             | 466 bp                    | 466 bp, 1723 bp, 5686 bp |
| S2 (S1F/S2R) | 2379 bp                             | 1122 bp                   | 2379 bp, 6342 bp         |
| S3 (S3F/S2R) | 3362 bp                             | 2106 bp                   | 7326 bp                  |
| D1 (D1F/D1R) | —                                   | —                         | 1533 bp                  |
| K (KF/KR)    | —                                   | —                         | 537 bp                   |

---

‘—’ indicates no fragments would be amplified.
